# Supplementary material for: The Role of Tyr-His-Trp Triad and Water Molecule Near the N1-Atom of 2-Hydroperoxycoelenterazine in Bioluminescence of Hydromedusan Photoproteins: Structural and Mutagenesis Study
Source: MDPI journal article supplement (doi:10.3390/ijms24076869), 2023-04-06
Supplement: s1 [file s1]

Supplementary materials for

# The Role of Tyr-His-Trp Triad and Water Molecule near the N1-atom of 2-hydroperoxycoelenterazine in Bioluminescence of Hydromedusan Photoproteins: Structural and Mutagenesis Study

**Pavel V. Natashin<sup>1</sup>, Ludmila P. Burakova<sup>1,2</sup>, Margarita I. Kovaleva<sup>3</sup>, Mikhail B. Shevtsov<sup>3</sup>, Daria A. Dmitrieva<sup>3</sup>, Elena V. Ereemeeva<sup>1,2</sup>, Svetlana V. Markova<sup>1,2</sup>, Alexey V. Mishin<sup>3</sup>, Valentin I. Borshchevskiy<sup>3,4\*</sup> and Eugene S. Vysotski<sup>1\*</sup>**

<sup>1</sup> Photobiology Laboratory, Institute of Biophysics SB RAS, Federal Research Center "Krasnoyarsk Science Center SB RAS", Krasnoyarsk, Russia

<sup>2</sup> Institute of Fundamental Biology and Biotechnology, Siberian Federal University, Krasnoyarsk, Russia

<sup>3</sup> Research Center for Molecular Mechanisms of Aging and Age-Related Diseases, Moscow Institute of Physics and Technology, Dolgoprudny, Russia

<sup>4</sup> Joint Institute for Nuclear Research, Dubna, Russia

\*Corresponding authors: Eugene Vysotski, e-mail <[eugene\\_vysotski@ibp.ru](mailto:eugene_vysotski@ibp.ru)>, tel. 7 (391) 2494430, fax 7 (391) 290-54-90; Valentin I. Borshchevskiy, e-mail <[borshchevskiy.vi@phystech.edu](mailto:borshchevskiy.vi@phystech.edu)> tel. 7 (964) 6328650, fax 7 (495) 408-68-69

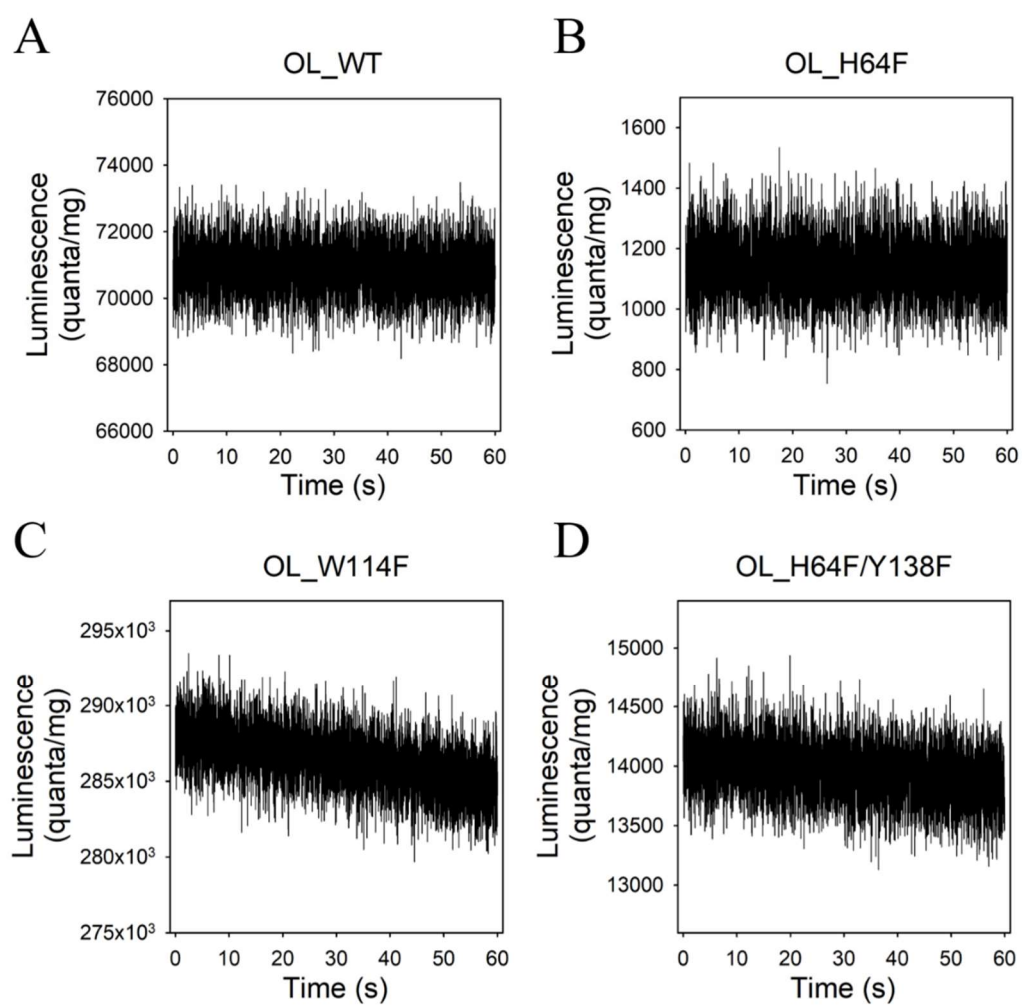

**Figure S1.** Ca<sup>2+</sup>-independent luminescence of wild-type obelin (A), OL\_H64F mutant (B), OL\_W114F mutant (C) and OL\_H64F/Y138F mutant (D).

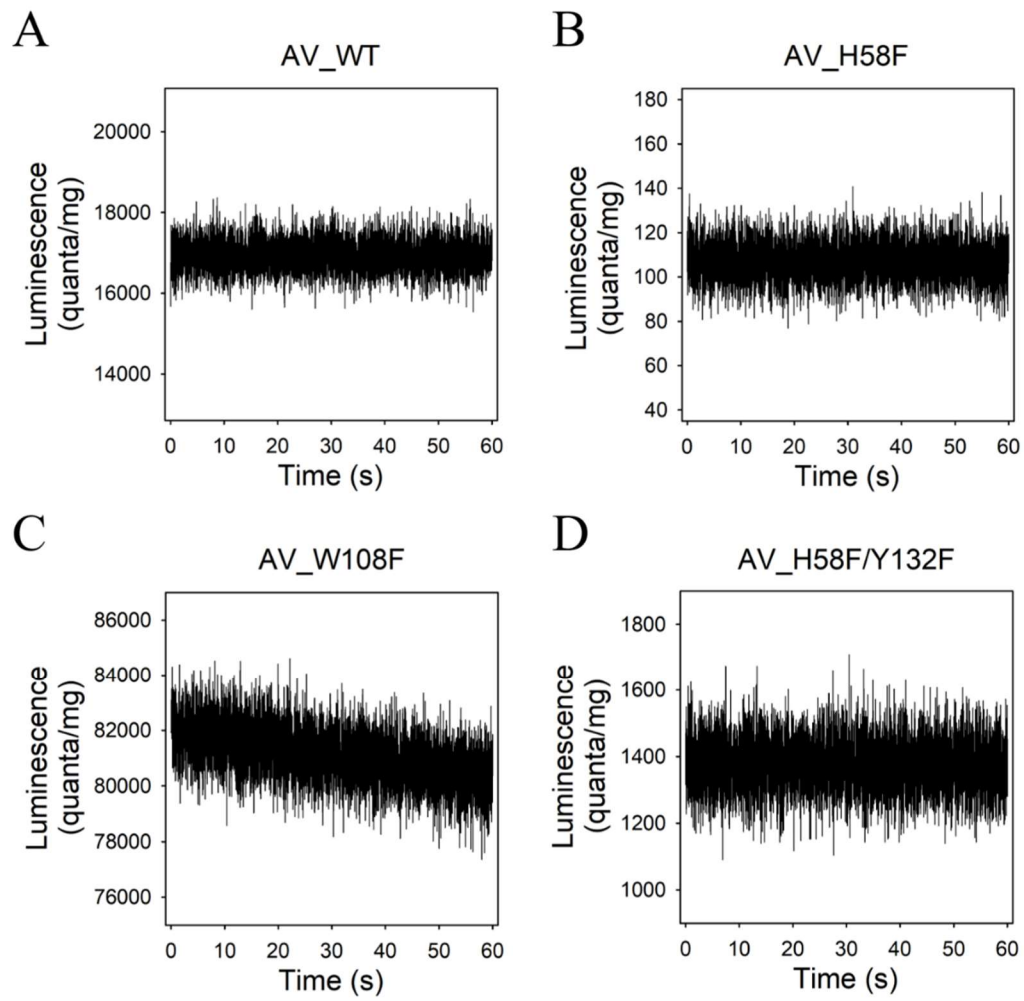

**Figure S2.** Ca<sup>2+</sup>-independent luminescence of wild-type aequorin (A), AV\_H58F mutant (B), AV\_W108F mutant (C) and AV\_H58F/Y132F mutant (D).
